# Supplementary material for: Factors influencing dabigatran or warfarin medication persistence in patients with nonvalvular atrial fibrillation
Source: Atypon-hosted journal article supplement (doi:10.2217/cer-2017-0081), 2018-05-29
Supplement: suppl_data.docx [file suppl_data.docx]

**Appendix A. Coding Algorithms Used For Study Exclusion Criteria, Driver-Specific Events and Construction of Comorbidity Score Measures**

| **Codes Used to Define Exclusion Criteria** | | | | | | | | |
| --- | --- | --- | --- | --- | --- | --- | --- | --- |
| **Variable** | | | **Codes** | | | | | **Code Type** |
| Cardiac Surgery | | | 00.5x, 35.xx, 36.xx, 37.xx | | | | | ICD-9 Procedure |
| Pericarditis | | | 391.x, 393, 420.x, 423.2, 036.41, 074.21, 093.81, 098.83 | | | | | ICD-9 Diagnosis |
| Myocarditis | | | 391.2, 422.xx, 074.23, 398.0, 429.0, 032.82, 036.43, 093.82, 130.3 | | | | | ICD-9 Diagnosis |
| Pulmonary Embolism | | | 415.1x | | | | | ICD-9 Diagnosis |
| Hyperthyroidism | | | 242.x | | | | | ICD-9 Diagnosis |
| Valvular heart disease | | | 394.0x, 394.2, 396.0, 396.1 | | | | | ICD-9 Diagnosis |
| 35.20, 35.22, 35.24, 35.26, 35.28 | | | | | ICD-9 Procedure |
| 33999, 0257T, 0258T, 0259T, 33405, 33425, 33426, 33427, 33430, 0262T, 33475, 33460, 33463, 33464, 33465, 33999, 0257T, 0258T, 0259T, 33405, 33425, 33426, 33427, 33430, 0262T, 33475, 33460, 33463, 33464, 33465 | | | | | CPT |
| **Codes Used to Define Comorbid Conditions of Interest and Disease Scores** | | | | | | | | |
| **Variable** | | | **Codes** | | | | | **Code Type** |
| Cancer | | | 140.xx-172.xx, 174.xx-208.xx, 230.xx-231.xx, 233.xx-234.xx | | | | | ICD-9 Diagnosis |
| Rheumatoid arthritis | | | 714.xx | | | | | ICD-9 Diagnosis |
| Multiple sclerosis | | | 340 | | | | | ICD-9 Diagnosis |
| Coronary artery disease | | | 411.xx, 412.xx, 413.xx, 414.xx, 429.2 | | | | | ICD-9 Diagnosis |
| Acute MI | | | 410.xx | | | | | ICD-9 Diagnosis |
| Cardiomyopathy | | | 425.xx | | | | | ICD-9 Diagnosis |
| Ischemic stroke | | | 433.x1, 434.x1, 436.x | | | | | ICD-9 Diagnosis |
| TIA | | | 435.x | | | | | ICD-9 Diagnosis |
| Left ventricular heart failure | | | 428.1 | | | | | ICD-9 Diagnosis |
| Congestive heart failure | | | 428.xx | | | | | ICD-9 Diagnosis |
| Atrial flutter | | | 427.32 | | | | | ICD-9 Diagnosis |
| Hypertension | | | 401.x, 402.x0, 403.xx, 404.x0, 404.x2, 405.xx | | | | | ICD-9 Diagnosis |
| Peripheral artery disease | | | 440.xx, 443.xx | | | | | ICD-9 Diagnosis |
| Liver disease | | | 121.1, 423.2, 570-573.xx, 751.62 | | | | | ICD-9 Diagnosis |
| Renal disease | | | 580.xx-588.xx, 590.xx-593.xx | | | | | ICD-9 Diagnosis |
| COPD/emphysema | | | 490-492.xx, 496 | | | | | ICD-9 Diagnosis |
| Hypothyroidism | | | 243-244.x | | | | | ICD-9 Diagnosis |
| Diabetes | | | 250.xx | | | | | ICD-9 Diagnosis |
| Peptic ulcer/GERD | | | 530.11, 530.81, 536.2, 536.8, 787.1, 533.xx | | | | | ICD-9 Diagnosis |
| Venous thromboembolism | | | 415.11, 415.19, 451.1x, 451.2, 451.81, 451.83, 451.84, 451.9,453.4x, 453.8x, 453.9 | | | | | ICD-9 Diagnosis |
| Hyperlipidemia | | | 272.0 – 272.4 | | | | | ICD-9 Diagnosis |
| HIV infection | | | V08, 042, 079.53 | | | | | ICD-9 Diagnosis |
| Bone Marrow disease | | |  | | | | | ICD-9 Diagnosis |
| Thrombocytopenia | | | 287.3, 287.4, 287.5 | | | | | ICD-9 Diagnosis |
| Chronic anemia | | | 285.2 | | | | | ICD-9 Diagnosis |
| Myelofibrosis | | | 289.83 | | | | | ICD-9 Diagnosis |
| Coagulopathy | | | 286.0-286.9, 287.1, 287.3-287.5 | | | | | ICD-9 Diagnosis |
| Dyspepsia | | | 536.8 | | | | | ICD-9 Diagnosis |
| **Deyo Charlson Comorbidity Categories, Diagnosis Codes, and Weights** | | | | | | | | |
| **Comorbidity** | | | **ICD-9 Diagnosis Codes** | | | | | **Weight** |
| Myocardial Infarction | | | 410.xx, 412.xx | | | | | 1 |
| Congestive Heart Failure | | | 428.xx | | | | | 1 |
| Peripheral Vascular Disease | | | 441.xx, 443.9, 785.4, V43.4, 38.48* | | | | | 1 |
| Cerebrovascular Disease | | | 430.xx-437.xx, 438.xx | | | | | 1 |
| Dementia | | | 290.xx | | | | | 1 |
| Chronic Pulmonary Disease | | | 490.xx-496.xx, 500.xx-505.xx, 506.4 | | | | | 1 |
| Connective Tissue Disease | | | 710.xx, 714.xx, 725.xx | | | | | 1 |
| Peptic Ulcer Disease | | | 531.4x-531.7x, 532.4x-532.7x, 533.4x-533.7x, 534.4x-534.7x, 531.0x-531.3x, 532.0x-532.3x, 533.0x-533.3x, 534.0x-534.3x, 531.9x, 532.9x, 533.9x, 534.9x | | | | | 1 |
| Mild Liver Disease | | | 571.2, 571.4, 571.5, 571.6 | | | | | 1 |
| Diabetes without Complications | | | 250.0x-250.3x, 250.7x | | | | | 1 |
| Diabetes with Complications | | | 250.4x-250.6x | | | | | 2 |
| Paraplegia and Hemiplegia | | | 342.x, 344.1 | | | | | 2 |
| Renal Disease | | | 582.x, 583.0-583.7, 585.xx, 586.xx, 588.xx | | | | | 2 |
| Cancer (Including Leukemia and Lymphoma) | | | 140.xx-172.xx, 174.xx-195.xx, 200.xx-208.xx | | | | | 2 |
| Moderate or Severe Liver Disease | | | 572.2-572.8 | | | | | 3 |
| Metastatic Carcinoma | | | 196.x-199.x | | | | | 6 |
| Acquired Immunodeficiency Syndrome (AIDS) | | | 042.xx-044.x | | | | | 6 |
| **Reference:** Deyo RA, Cherkin DC, and Ciol MA. Adapting a clinical comorbidity index for use with ICD-9-CM administrative databases. Journal of Clinical Epidemiology 1992; 45: 613-619. | | | | | | | | |
| **CHADS2 Stroke Risk Score** | | | | | | | | |
|  | | **CHADS2 Risk Criteria** | | | **ICD-9-CM Codes** | **CHADS2 Score** | | |
| C | | Congestive Heart Failure | | | 428.x | 1 | | |
| H | | Hypertension | | | 401.x–405.x, 437.2 | 1 | | |
| A | | Age ≥75 | | | - | 1 | | |
| D | | Diabetes | | | 250.x | 1 | | |
| S2 | | Stroke/ transient ischemic attack (TIA) | | | 433.x1, 434.x1, 435.x, 436, 437.1x, 437.9x, 438.x | 2 | | |
| After assessing the risk factors and adding up the risk score, the stroke risk classifications are as below: | | | | | | | | |
| **Score** | | | | | **CHADS2Stroke Risk Classification** | | | |
| 0 | | | | | Low | | | |
| 1 | | | | | Intermediate | | | |
| 2-6 | | | | | High | | | |
| **Reference:** Gage BF, Waterman AD, Shannon W, Boechler M, Rich MW, Radford MJ. Validation of clinical classification schemes for predicting stroke: results from the National Registry of Atrial Fibrillation. JAMA. 2001 Jun; 285(22):2864-2870. | | | | | | | | |
| **CHADS2 Stroke Risk Score** | | | | | | | | |
|  | | **CHA2DS2-VASc Criteria** | | | **ICD-9-CM** | **CHA2DS2-VASc Score** | | |
| **C** | | Congestive heart failure or left ventricle dysfunction | | | 428.x, 398.91, 402.01, 402.11, 402.91, 404.01, 404.11, 404.91, 404.03, 404.13, 404.93, 425.4, 425.5, 425.7 | 1 | | |
| **H** | | Hypertension | | | 401.x–405.x, 437.2 | 1 | | |
| **A** | | Age ≥75 | | | - | 2 | | |
| **D** | | Diabetes Mellitus | | | 250.x | 1 | | |
| **S** | | Stroke/TIA | | | 433.x1, 434.x1, 435.x, 436, 437.1x, 437.9x, 438.x | 2 | | |
| **V** | | Vascular disease (prior myocardial infarction, peripheral artery disease, or aortic plaque) | | | 410.xx, 412.xx; 440.2x, 443.8x, 443.9x; ICD-9 proc code: 88.48; CPT code: 75710, 75716, 93922, 93923 | 1 | | |
| **A** | | Age between 65 and 74 years | | | - | 1 | | |
| **S** | | Female | | | - | 1 | | |
| **Total Score** | | | | | | **0-9** | | |
| After assessing the risk factors and adding up the risk score, the stroke risk classifications are as below: | | | | | | | | |
| **Score** | | | | | **CHA2DS2-VASc Stroke Risk Classification** | | | |
| 0 | | | | | Low | | | |
| 1 | | | | | Intermediate | | | |
| 2 or greater | | | | | High | | | |
| **Reference:** Lip GY, Nieuwlaat R, Pisters R, Lane DA, Crijns HJ. (2010). Refining Clinical Risk Stratification for Predicting Stroke and Thromboembolism in Atrial Fibrillation Using A Novel Risk Factor-Based Approach: The Euro Heart Survey on Atrial Fibrillation. Chest; 137(2):263-72. Epub 2009 Sep 17. | | | | | | | | |
| **HEMORR2HAGES Bleed Risk Score** | | | | | | | | |
|  | **Clinical Characteristic** | | | **ICD-9-CM** | | | **Score** | |
| H | Hepatic or renal disease | | | 070.x, 570-573.x, 585-585.5x, 585.9x | | | 1 | |
| E | Ethanol (alcohol) abuse | | | 303.x, 305.0x, V11.3 | | | 1 | |
| M | Malignancy | | | 140-208.xx | | | 1 | |
| O | Older age (>75) | | | - | | | 1 (Except if Prior Bleed above is positive, then Age>75 = 2) | |
| R | Reduced platelet count or function | | | 287.xx | | | 1 | |
| R | Rebleeding risk | | | 523.8x, 528.9x, 530.82, 537.83, 562.03, 562.13, 569.3x, 569.83, 456.0x,456.20, 531.0x, 531.2x, 531.4x,  531.6x, 532.0x, 532.2x, 532.4x, 532.6x,533.0x, 533.2x, 533.4x, 533.6x, 534.0x,534.2x, 534.4x, 534.6x, 578.xx, 784.7x, 784.8x, 786.3x, 246.3x, 286.5x, 362.81,379.23, 386.8x, 388.69, 448.9x, 459.xx,568.81, 596.8x, 599.7x, 626.6x, 627.1x,727.89, 958.2x, 363.61-363.62, 7l9.1x, 998.1x, E934.2 | | | 2 | |
| H | Hypertension (uncontrolled) | | | ICD-9 code: 401.xx – 405.xx | | | 1 | |
| A | Anemia | | | 280.xx-285.xx | | | 1 | |
| G | Genetic factors | | | - | | | 1 | |
| E | Excessive fall risk | | | E880.x-E888.x, 332.xx, 334.xx, 781.2x, 290.0x-294.0x, 458.0x, 780.4x, 357.2x, 357.5x, 296.0x, 296.4x-296.89, 296.2x, 296.3x, 311.xx, 295-295.9x, 297-297.9x | | | 1 | |
| S | Stroke | | | 430.xx-432.xx, 433.xx, 434.xx, 436.xx, 437.1x | | | 1 | |
| Total Score | | | | | | | 0-12 | |
| After assessing the risk factors and adding up the risk score, the bleeding risk classifications are as below: | | | | | | | | |
| **Score** | | | | | **HEMORR2HAGES Score Classification** | | | |
| 0-1 | | | | | *Low* | | | |
| 2-3 | | | | | *Intermediate* | | | |
| ≥4 | | | | | *High* | | | |
| **Reference**: Gage BF, Yan Y, Milligan PE, et al. Clinical classification schemes for predicting hemorrhage: Results from the National Registry of Atrial Fibrillation (NRAF). Am Heart J. 2006 Mar; 151(3):713-719. | | | | | | | | |

**Appendix B. Generic Product Identifier Codes for Medications of Interest**

| **Description** | **Generic product identifier codes starting with** |
| --- | --- |
| Beta blockers | 33 |
| Calcium channel blockers | 34 |
| Antihypertensives | 36 |
| Diuretics | 37 |
| Antihyperlipidemics | 39 |
| Corticosteroids | 22 |
| Antidiabetics | 27 |
| Antiarrhythmics: | |
| Amiodarone HCl | 3540000 |
| Propafenone and Flecainide | 353000 |
| Dronedarone | 35400028 |
| Betapace (Sotalol) | 33100045 |
| Tikosyn | 35400025 |
| Disopyramide (Norpace) | 35100010 |
| Quinidine | 351000301 |
| Ketoconazole | 11404040 |
| Antiplatelet |  |
| Clopidogrel | 85158020 |
| **Brilinta (**ticagrelor) | 85158470 |
| Prasugrel | 85158060100330, 85158060100320 |
| Ticlopidine | 85158080100320 |
| Cilostazol | 85155516000320,  85155516000330 |
| Dipyridamole | 85150030000310, 85150030000320, 85150030000330 |
| NSAIDs | 6610 |

**Appendix C. Generic Product Identifier Codes for Cardiovascular Medications of Interest**

| **Description** | **GPI Codes starting with** |
| --- | --- |
| Rate control medications |  |
| Beta blockers | 3300 |
| Calcium channel blockers |  |
| Verapamil | 34000030100 |
| Diltiazem | 340000101 |
| Digoxin/digitoxin | 321000 |
| Dronedarone | 35400028100320 |
| Amiodarone | 3540000500 |
| Rhythm control medications |  |
| Disopyramide (Norpace) | 35100010 |
| Procainamide | 3510002010 |
| Flecainide | 3530001 |
| Propafenone | 3530005 |
| Betapace (Sotalol) | 33100045 |
| Tikosyn (Dofetilide) | 35400025 |
| Quinidine | 351000301 |
| Mexiletine | 352000251 |
| Moricizine | 350500301003 |
| Other |  |
| ACE Inhibitors | 3610 |
| Angiotensin-II Receptor Blockers (ARB) | 3615 |
| Diuretics (Thiazide, loop) | 3720, 3760 |
| Antihypertensives (excluding above group) | 3620,3625,3630,3640,3660 |
| OAC |  |
| Dabigatran | 833370302001 |
| Argatroban | 83337015 |
| Warfarin | 83200030 |
| Heparin | 83100020 |
| Enoxaparin | 83101020 |
| Tinzaparin | 83101080 |
| Dalteparin | 83101010 |
| Fondaparinux | 83103030 |
| Rivaroxaban | 83370060 |
| Antiplatelet |  |
| Clopidogrel | 85158020 |
| **Brilinta (**ticagrelor) | 85158470 |
| Prasugrel | 85158060100330, 85158060100320 |
| Ticlopidine | 85158080100320 |
| Cilostazol | 85155516000320,  85155516000330 |
| Dipyridamole | 85150030000310, 85150030000320, 85150030000330 |
| NSAIDs | 6610 |

**Appendix D. Attrition Diagram for Patient Selection**

**
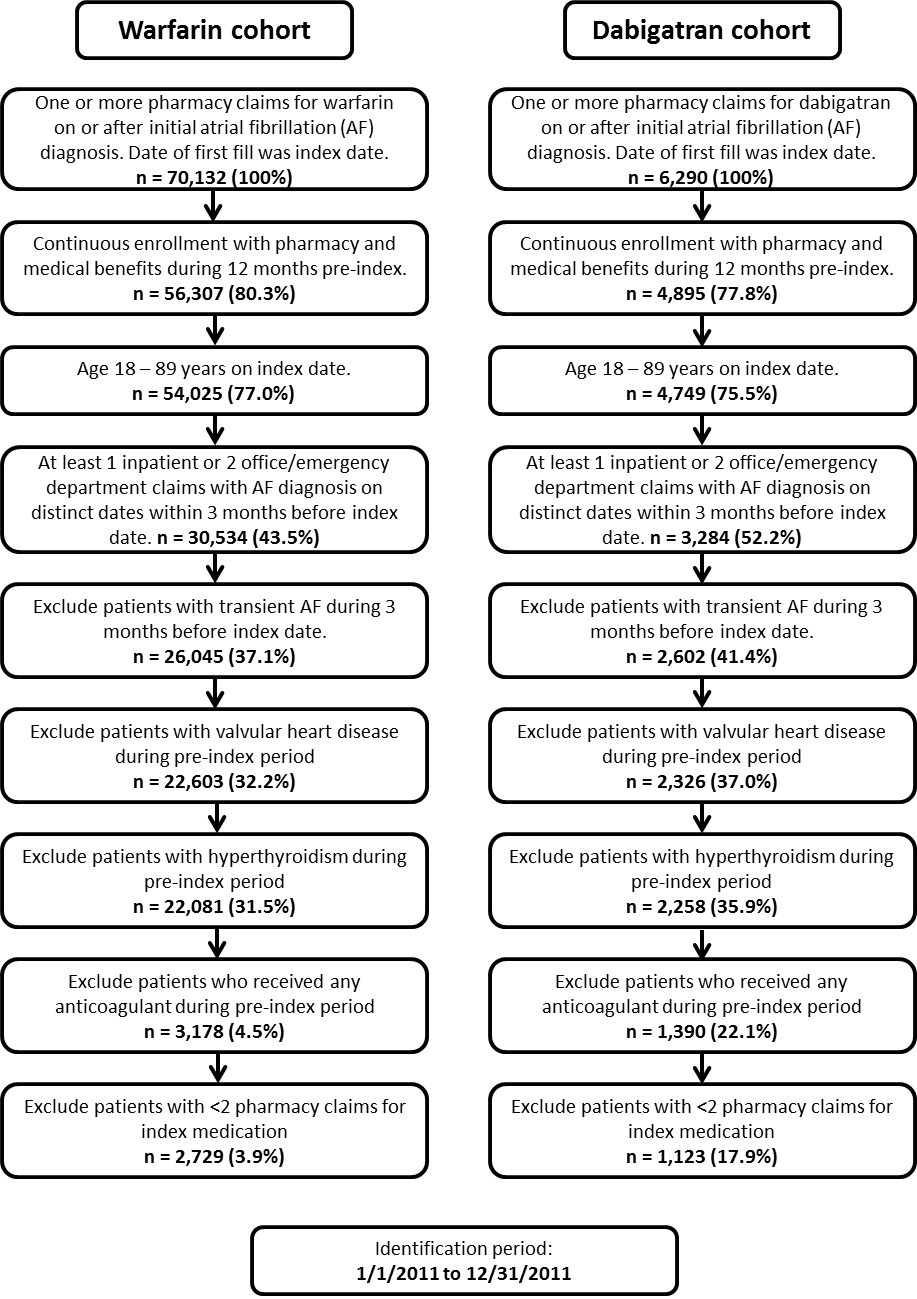
**

**Appendix E. Post-PSM Baseline Patient Demographic Characteristics**

| **Measure** | **Dabigatran cohort** | **Warfarin cohort** | **Standardized Differences** | |
| --- | --- | --- | --- | --- |
| **n** | **1025** | **1025** | **Before PSM** | **After PSM** |
| **Demographic Characteristics** | | | | |
| Age, mean (SD) | 73.91 (±8.07) | 74.04 (±8.23) | 0.238 | 0.016 |
| Gender = Female (vs. male), n (%) | 474 (46.2%) | 456 (44.5%) | 0.077 | 0.035 |
| Race/Ethnicity*, n (%) |  |  |  |  |
| White | 881 (92.6%) | 865 (91.1%) | 0.152 | 0.044 |
| Black | 43 (4.5%) | 57 (6.0%) | 0.092 | 0.063 |
| Hispanic | < 10 | 15 (1.6%) | 0.057 | 0.054 |
| Other | 16 (1.7%) | 10 (1.1%) | 0.033 | 0.052 |
| Unknown | < 10 | < 10 | 0.292 | 0.007 |
| Geographic Region, n (%) |  |  |  |  |
| Northeast | 25 (2.4%) | 28 (2.7%) | 0.010 | 0.018 |
| Midwest | 250 (24.4%) | 252 (24.6%) | 0.144 | 0.005 |
| South | 660 (64.4%) | 651 (63.5%) | 0.182 | 0.018 |
| West | 90 (8.8%) | 94 (9.2%) | 0.078 | 0.014 |
| Line of business=Medicare (vs. commercial), n (%) | 951 (92.8%) | 950 (92.7%) |  |  |
| Plan Type, n (%) |  |  |  |  |
| Medicare-HMO | 375 (36.6%) | 378 (36.9%) | 0.075 | 0.006 |
| Medicare-PPO | 419 (40.9%) | 418 (40.8%) | 0.036 | 0.002 |
| Medicare-FFS | 157 (15.3%) | 154 (15.0%) | 0.150 | 0.008 |
| Commercial | 74 (7.2%) | 75 (7.3%) | 0.287 | 0.004 |
| Estimated Household Income, n(%) |  |  |  |  |
| < $15,000 | 132 (12.9%) | 164 (16.0%) | 0.136 | 0.089 |
| $15,000 - $19,999 | 42 (4.1%) | 43 (4.2%) | 0.026 | 0.005 |
| $20,000 - $29,999 | 75 (7.3%) | 94 (9.2%) | 0.099 | 0.067 |
| $30,000 - $39,999 | 80 (7.8%) | 92 (9.0%) | 0.061 | 0.042 |
| $40,000 - $49,999 | 81 (7.9%) | 100 (9.8%) | 0.058 | 0.065 |
| $50,000 - $59,999 | 106 (10.3%) | 88 (8.6%) | 0.049 | 0.060 |
| $60,000 - $74,999 | 119 (11.6%) | 126 (12.3%) | 0.035 | 0.021 |
| $75,000 - $99,999 | 145 (14.1%) | 152 (14.8%) | 0.063 | 0.019 |
| $100,000 - $124,999 | 78 (7.6%) | 56 (5.5%) | 0.115 | 0.087 |
| $125,000 - $149,999 | 47 (4.6%) | 26 (2.5%) | 0.149 | 0.111 |
| $150,000 - $199,999 | 33 (3.2%) | 25 (2.4%) | 0.106 | 0.047 |
| $200,000 - $249,999 | 18 (1.8%) | < 10 | 0.137 | 0.087 |
| $250,000 - $399,999 | < 10 | < 10 | 0.046 | 0.037 |
| $400,000 - $499,999 | < 10 | < 10 | 0.021 | 0.000 |
| $500,000+ | < 10 | < 10 | 0.059 | 0.050 |
| Unknown | 55 (5.4%) | 43 (4.2%) | 0.028 | 0.055 |
| SD: Standard deviation. IQR: Interquartile range. |  |  |  |  |
| *Note:* |  |  |  |  |
| ** Default race for Medicare members only.* |  |  |  |  |

**Appendix F. Post-PSM Clinical and Cost Characteristics: Dabigatran Compared to Warfarin Cohort**

| **Measure** | **Dabigatran cohort** | **Warfarin cohort** | **Standardized Differences** | |
| --- | --- | --- | --- | --- |
| **n** | **1025** | **1025** | **Before PSM** | **After PSM** |
| **Clinical Characteristics** | | | | |
| Deyo Charlson Comorbidity Index, mean (SD) | 2.12 (±2.07) | 2.22 (±2.27) | 0.355 | 0.043 |
| Deyo Charlson Comorbidity Index, median [IQR] | 2.00 [2.00] | 2.00 [2.00] |  |  |
| Comorbidities of interest (n%) |  |  |  |  |
| Cancer | 83 (8.1%) | 85 (8.3%) | 0.061 | 0.007 |
| Rheumatoid arthritis | 21 (2.0%) | 24 (2.3%) | 0.050 | 0.020 |
| Multiple sclerosis | 0 | < 10 | 0.027 | 0.044 |
| Coronary artery disease | 352 (34.3%) | 362 (35.3%) | 0.089 | 0.020 |
| Acute myocardial infarction | 28 (2.7%) | 31 (3.0%) | 0.107 | 0.018 |
| Cardiomyopathy | 85 (8.3%) | 72 (7.0%) | 0.046 | 0.048 |
| Ischemic stroke | 119 (11.6%) | 122 (11.9%) | 0.066 | 0.009 |
| Transient ischemic attack | 79 (7.7%) | 74 (7.2%) | 0.024 | 0.019 |
| Congestive heart failure | 253 (24.7%) | 250 (24.4%) | 0.268 | 0.007 |
| Left ventricular heart failure | 13 (1.3%) | 15 (1.5%) | 0.039 | 0.017 |
| Atrial flutter | 136 (13.3%) | 129 (12.6%) | 0.066 | 0.020 |
| Hypertension | 869 (84.8%) | 866 (84.5%) | 0.059 | 0.008 |
| Peripheral artery disease | 131 (12.8%) | 135 (13.2%) | 0.121 | 0.012 |
| Liver disease | 26 (2.5%) | 20 (2.0%) | 0.053 | 0.040 |
| Renal disease | 249 (24.3%) | 266 (26.0%) | 0.286 | 0.038 |
| Chronic obstructive pulmonary disease/emphysema | 204 (19.9%) | 209 (20.4%) | 0.190 | 0.012 |
| Diabetes | 325 (31.7%) | 328 (32.0%) | 0.176 | 0.006 |
| Peptic ulcer/gastroesophageal reflux disease (GERD) | 149 (14.5%) | 154 (15.0%) | 0.058 | 0.014 |
| Venous thromboembolism | < 10 | 37 (3.6%) | 0.272 | 0.203 |
| Hyperlipidemia | 593 (57.9%) | 606 (59.1%) | 0.027 | 0.026 |
| HIV infection | 0 | < 10 | 0.047 | 0.044 |
| Bone marrow disease (thrombocytopenia, chronic anemia, myelofibrosis) | 39 (3.8%) | 45 (4.4%) | 0.142 | 0.030 |
| Coagulopathy (hemophilia, Von Willebrand disease) | < 10 | 16 (1.6%) | 0.140 | 0.133 |
| Dyspepsia | < 10 | < 10 | 0.026 | 0.024 |
| Other Medication Use (n%) |  |  |  |  |
| Beta blockers | 746 (72.8%) | 739 (72.1%) | 0.023 | 0.015 |
| Calcium channel blockers | 458 (44.7%) | 463 (45.2%) | 0.097 | 0.010 |
| Diuretics | 463 (45.2%) | 453 (44.2%) | 0.215 | 0.020 |
| Other antihypertensives (i.e. ACE inhibitors, combinations) | 677 (66.0%) | 694 (67.7%) | 0.060 | 0.035 |
| Antihyperlipidemics | 609 (59.4%) | 605 (59.0%) | 0.014 | 0.008 |
| Corticosteroids | 205 (20.0%) | 194 (18.9%) | 0.088 | 0.027 |
| Antidiabetics | 263 (25.7%) | 265 (25.9%) | 0.124 | 0.004 |
| Antiarrhythmics | 244 (23.8%) | 248 (24.2%) | 0.182 | 0.009 |
| Ketoconazole | 19 (1.9%) | 18 (1.8%) | 0.007 | 0.007 |
| Antiplatelets (e.g., dipyridamole, aspirin, etc.) | 161 (15.7%) | 163 (15.9%) | 0.116 | 0.005 |
| Month of index exposure (n%) |  |  |  |  |
| January | 101 (9.9%) | 133 (13.0%) | 0.124 | 0.098 |
| February | 88 (8.6%) | 132 (12.9%) | 0.091 | 0.139 |
| March | 87 (8.5%) | 114 (11.1%) | 0.106 | 0.089 |
| April | 88 (8.6%) | 107 (10.4%) | 0.040 | 0.063 |
| May | 95 (9.3%) | 99 (9.7%) | 0.009 | 0.013 |
| June | 106 (10.3%) | 67 (6.5%) | 0.103 | 0.137 |
| July | 84 (8.2%) | 60 (5.9%) | 0.093 | 0.092 |
| August | 71 (6.9%) | 65 (6.3%) | 0.022 | 0.024 |
| September | 78 (7.6%) | 72 (7.0%) | 0.038 | 0.022 |
| October | 86 (8.4%) | 54 (5.3%) | 0.099 | 0.124 |
| November | 77 (7.5%) | 53 (5.2%) | 0.062 | 0.096 |
| Number of unique medication classes, mean (SD) | 11.42 (±5.88) | 11.65 (±5.53) | 0.196 | 0.039 |
| Number of unique medication classes, median [IQR] | 11.00 [8.00] | 11.00 [7.00] |  |  |
| Number of prescriptions for cardiovascular medications, mean (SD) | 9.93 (±7.60) | 9.95 (±7.38) | 0.058 | 0.003 |
| Number of prescriptions for cardiovascular medications, median [IQR] | 9.00 [10.00] | 9.00 [9.00] |  |  |
| Days from AF to index, mean (SD) | 20.66 (±22.86) | 20.57 (±23.62) | 0.008 | 0.004 |
| Days from AF to index, median [IQR] | 10.00 [30.00] | 8.00 [28.00] |  |  |
| Baseline stroke risk |  |  |  |  |
| CHADS2 stroke risk score, mean (SD) | 2.20 (±1.25) | 2.26 (±1.26) | 0.320 | 0.047 |
| CHADS2 stroke risk score, median [IQR] | 2.00 [2.00] | 2.00 [2.00] |  |  |
| CHA2DS2-VASc stroke risk score, mean (SD) | 3.75 (±1.52) | 3.80 (±1.56) | 0.340 | 0.029 |
| CHA2DS2-VASc stroke risk score, median [IQR] | 4.00 [2.00] | 4.00 [2.00] |  |  |
| Baseline bleeding risk: HEMORR2HAGES score, mean (SD) | 2.37 (±1.47) | 2.43 (±1.51) | 0.355 | 0.039 |
| Baseline bleeding risk: HEMORR2HAGES score, median [IQR] | 2.00 [2.00] | 2.00 [2.00] |  |  |
| Index prescriber specialty (n%) |  |  |  |  |
| Family practice | 187 (18.2%) | 173 (16.9%) | 0.193 | 0.036 |
| Internal medicine | 480 (46.8%) | 497 (48.5%) | 0.094 | 0.033 |
| Cardiology | 161 (15.7%) | 170 (16.6%) | 0.314 | 0.024 |
| Neurology | < 10 | < 10 | 0.013 | 0.040 |
| Emergency medicine | 12 (1.2%) | 10 (1.0%) | 0.071 | 0.019 |
| Pulmonary medicine | 0 | 0 | 0.038 | . |
| Hematology | 0 | < 10 | 0.047 | 0.044 |
| Geriatrics | < 10 | < 10 | 0.033 | 0.000 |
| Gastroenterology | < 10 | 0 | 0.006 | 0.044 |
| Surgery | < 10 | < 10 | 0.110 | 0.000 |
| Other | 144 (14.0%) | 140 (13.7%) | 0.137 | 0.011 |
| Pre-index total medical cost, mean (SD) | 13,681 (±18,674) | 15,991 (±22,979) | 0.291 | 0.110 |
| Pre-index total medical cost, median [IQR] | 8,405 [11,732] | 9,124 [13,413] |  |  |
| Pre-index total pharmacy cost, mean (SD) | 2,498 (±2,847) | 2,287 (±3,797) | 0.110 | 0.063 |
| Pre-index total pharmacy cost, median [IQR] | 1,716 [2,818] | 1,517 [2,529] |  |  |
| Pre-index out-of-pocket medical cost, mean (SD) | 1,359 (±1,569) | 1,480 (±1,807) | 0.190 | 0.071 |
| Pre-index out-of-pocket medical cost, median [IQR] | 873 [1,388] | 877 [1,583] |  |  |
| Pre-index out-of-pocket pharmacy cost, mean (SD) | 664 (±879) | 590 (±785) | 0.160 | 0.088 |
| Pre-index out-of-pocket pharmacy cost, median [IQR] | 362 [737] | 354 [638] |  |  |
| SD: Standard deviation. IQR: Interquartile range. |  |  |  |  |
| *Note:* | | | | |
| All cost amounts were inflation-adjusted to 2015 United States Dollars. | | | | |

**Appendix G. Distributions of Monthly OOP Costs for Dabigatran and Warfarin**

**Distribution of Monthly OOP Costs for Dabigatran**


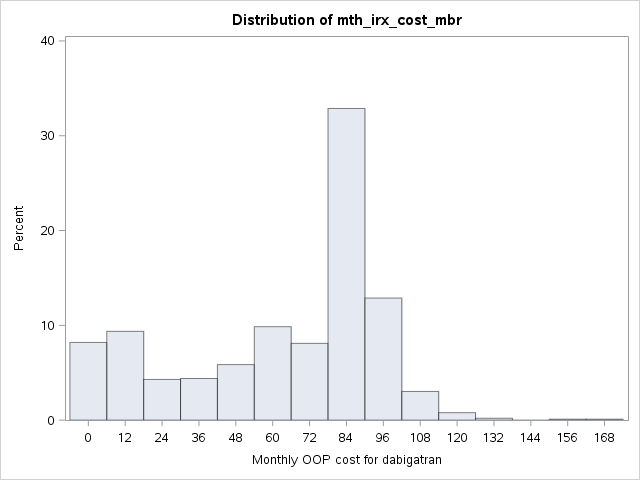


| Level | Quantile |
| --- | --- |
| 100% Max | 173.84201 |
| 99% | 114.41976 |
| 95% | 100.35657 |
| 90% | 94.69632 |
| 75% Q3 | 89.28 |
| 50% Median | 77.856 |
| 25% Q1 | 35.75006 |
| 10% | 7.00959 |
| 5% | 3.18755 |
| 1% | 0 |
| 0% Min | 0 |

**Distribution of Monthly OOP Costs for Warfarin**


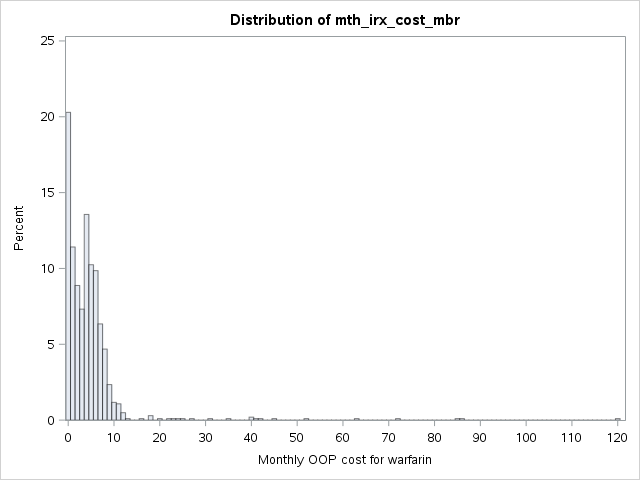


| Level | Quantile |
| --- | --- |
| 100% Max | 120.451482 |
| 99% | 39.737571 |
| 95% | 9.540451 |
| 90% | 7.812 |
| 75% Q3 | 5.812165 |
| 50% Median | 3.7554 |
| 25% Q1 | 0.950749 |
| 10% | 0 |
| 5% | 0 |
| 1% | 0 |
| 0% Min | 0 |

**Appendix F. Association of Non-Persistence with Treatment Cohort (Dabigatran vs. Warfarin), Adjusting for Covariates**

| **Parameter** | **Estimate** | **Standard error** | **Chi Sq** | ***P*-value** | **Hazard ratio** | **Lower 95% CI** | **Upper 95% CI** |
| --- | --- | --- | --- | --- | --- | --- | --- |
| Cohort (Dabigatran vs. Warfarin, 1=Dabigatran) | -0.073 | 0.098 | 0.559 | 0.455 | 0.930 | 0.766 | 1.123 |
| Monthly pharmacy OOP cost for index medication | 0.005 | 0.001 | 15.434 | <0.0001 | 1.005 | 1.002 | 1.007 |
| Age | -0.003 | 0.006 | 0.267 | 0.606 | 0.997 | 0.986 | 1.008 |
| Gender: female vs. male | 0.061 | 0.078 | 0.610 | 0.435 | 1.062 | 0.913 | 1.237 |
| Race/ethnicity: Unknown vs. White | 0.360 | 0.512 | 0.494 | 0.482 | 1.433 | 0.438 | 3.435 |
| Race/ethnicity: Other vs. White | 0.072 | 0.265 | 0.074 | 0.786 | 1.075 | 0.611 | 1.742 |
| Race/ethnicity: Hispanics vs. White | 0.314 | 0.254 | 1.524 | 0.217 | 1.368 | 0.801 | 2.181 |
| Race/ethnicity: Black vs. White | 0.032 | 0.142 | 0.050 | 0.824 | 1.032 | 0.773 | 1.350 |
| Region: West vs. Northeast | 0.073 | 0.203 | 0.130 | 0.718 | 1.076 | 0.731 | 1.622 |
| Region: Southwest vs. Northeast | -0.046 | 0.183 | 0.065 | 0.799 | 0.955 | 0.678 | 1.390 |
| Region: Midwest vs. Northeast | -0.238 | 0.188 | 1.599 | 0.206 | 0.788 | 0.553 | 1.159 |
| Plan type: commercial vs. Medicare HMO | -0.039 | 0.524 | 0.006 | 0.941 | 0.962 | 0.389 | 3.205 |
| Plan type: Medicare FFS vs. Medicare HMO | -0.111 | 0.095 | 1.371 | 0.242 | 0.895 | 0.741 | 1.076 |
| Plan type: Medicare PPO vs. Medicare HMO | 0.013 | 0.071 | 0.032 | 0.858 | 1.013 | 0.881 | 1.164 |
| Household income: unknown vs. <$15,000 | 0.102 | 0.154 | 0.444 | 0.505 | 1.108 | 0.814 | 1.489 |
| Household income: >$100,000 vs. <$15,000 | 0.127 | 0.112 | 1.268 | 0.260 | 1.135 | 0.911 | 1.416 |
| Household income: $50,000 - $100,000 vs. <$15,000 | 0.008 | 0.097 | 0.006 | 0.937 | 1.008 | 0.835 | 1.221 |
| Household income: $15,000 - $50,000 vs. <$15,000 | 0.077 | 0.098 | 0.625 | 0.429 | 1.080 | 0.894 | 1.310 |
| Deyo-Charlson comorbidity score | 0.023 | 0.024 | 0.908 | 0.341 | 1.023 | 0.975 | 1.073 |
| CHA2DS2VASc stroke risk score | -0.050 | 0.050 | 1.015 | 0.314 | 0.951 | 0.863 | 1.048 |
| HEMORR2HAGES bleed risk score | 0.031 | 0.030 | 1.029 | 0.311 | 1.031 | 0.971 | 1.094 |
| Cancer | 0.099 | 0.118 | 0.705 | 0.401 | 1.104 | 0.872 | 1.387 |
| Rheumatoid arthritis | -0.292 | 0.218 | 1.788 | 0.181 | 0.747 | 0.474 | 1.119 |
| Coronary artery disease | -0.033 | 0.069 | 0.228 | 0.633 | 0.967 | 0.844 | 1.108 |
| Acute myocardial infarction | 0.137 | 0.181 | 0.575 | 0.448 | 1.147 | 0.793 | 1.613 |
| Cardiomyopathy | -0.078 | 0.118 | 0.435 | 0.510 | 0.925 | 0.731 | 1.160 |
| Ischemic stroke | -0.090 | 0.128 | 0.499 | 0.480 | 0.914 | 0.711 | 1.172 |
| Transient ischemic attack | 0.104 | 0.128 | 0.658 | 0.417 | 1.110 | 0.859 | 1.422 |
| Congestive heart failure | 0.185 | 0.093 | 3.959 | 0.047 | 1.203 | 1.002 | 1.442 |
| Left ventricular heart failure | -0.252 | 0.272 | 0.859 | 0.354 | 0.777 | 0.438 | 1.278 |
| Atrial flutter | 0.171 | 0.087 | 3.867 | 0.049 | 1.187 | 0.998 | 1.404 |
| Hypertension | 0.127 | 0.104 | 1.474 | 0.225 | 1.135 | 0.927 | 1.395 |
| Peripheral artery disease | 0.047 | 0.098 | 0.228 | 0.633 | 1.048 | 0.862 | 1.266 |
| Liver disease | -0.194 | 0.210 | 0.852 | 0.356 | 0.824 | 0.534 | 1.220 |
| Renal disease | -0.010 | 0.082 | 0.014 | 0.908 | 0.991 | 0.843 | 1.162 |
| Chronic obstructive pulmonary disease/emphysema | 0.020 | 0.082 | 0.059 | 0.808 | 1.020 | 0.868 | 1.196 |
| Diabetes | -0.008 | 0.119 | 0.005 | 0.944 | 0.992 | 0.783 | 1.249 |
| Peptic ulcer/gastroesophageal reflux disease (GERD) | 0.057 | 0.084 | 0.460 | 0.498 | 1.059 | 0.896 | 1.244 |
| Venous thromboembolism | -0.277 | 0.220 | 1.589 | 0.208 | 0.758 | 0.480 | 1.141 |
| Hyperlipidemia | -0.135 | 0.073 | 3.443 | 0.064 | 0.874 | 0.759 | 1.008 |
| Bone marrow disease (thrombocytopenia, chronic anemia, myelofibrosis) | 0.176 | 0.152 | 1.347 | 0.246 | 1.193 | 0.878 | 1.593 |
| Coagulopathy (hemophilia, Von Willebrand disease) | -0.027 | 0.317 | 0.007 | 0.933 | 0.974 | 0.493 | 1.728 |
| Dyspepsia | -0.260 | 0.367 | 0.503 | 0.478 | 0.771 | 0.345 | 1.481 |
| Beta blockers | -0.006 | 0.070 | 0.007 | 0.933 | 0.994 | 0.867 | 1.142 |
| Calcium channel blockers | -0.002 | 0.062 | 0.001 | 0.980 | 0.998 | 0.884 | 1.128 |
| Diuretics | 0.022 | 0.066 | 0.106 | 0.745 | 1.022 | 0.897 | 1.164 |
| Other antihypertensives (i.e. ACE inhibitors, combinations) | 0.081 | 0.070 | 1.343 | 0.247 | 1.084 | 0.946 | 1.245 |
| Antihyperlipidemics | -0.057 | 0.075 | 0.580 | 0.446 | 0.945 | 0.816 | 1.094 |
| Corticosteroids | 0.054 | 0.078 | 0.482 | 0.488 | 1.056 | 0.904 | 1.229 |
| Antidiabetics | 0.003 | 0.116 | 0.001 | 0.982 | 1.003 | 0.801 | 1.260 |
| Antiarrhythmics | 0.288 | 0.070 | 17.111 | <0.0001 | 1.334 | 1.163 | 1.528 |
| Ketoconazole | -0.045 | 0.225 | 0.041 | 0.841 | 0.956 | 0.597 | 1.445 |
| Antiplatelets (e.g., dipyridamole, aspirin, etc.) | 0.121 | 0.088 | 1.889 | 0.169 | 1.129 | 0.948 | 1.340 |
| Index month: December vs. January | -0.182 | 0.154 | 1.391 | 0.238 | 0.834 | 0.614 | 1.124 |
| Index month: November vs. January | -0.162 | 0.155 | 1.081 | 0.299 | 0.851 | 0.624 | 1.149 |
| Index month: October vs. January | 0.010 | 0.147 | 0.005 | 0.944 | 1.010 | 0.756 | 1.344 |
| Index month: September vs. January | 0.009 | 0.141 | 0.004 | 0.948 | 1.009 | 0.763 | 1.329 |
| Index month: August vs. January | 0.175 | 0.143 | 1.489 | 0.222 | 1.191 | 0.897 | 1.575 |
| Index month: July vs. January | 0.096 | 0.141 | 0.458 | 0.499 | 1.100 | 0.832 | 1.448 |
| Index month: June vs. January | 0.141 | 0.134 | 1.112 | 0.292 | 1.151 | 0.885 | 1.496 |
| Index month: May vs. January | 0.076 | 0.130 | 0.338 | 0.561 | 1.079 | 0.835 | 1.393 |
| Index month: April vs. January | 0.017 | 0.134 | 0.016 | 0.900 | 1.017 | 0.781 | 1.323 |
| Index month: March vs. January | -0.048 | 0.132 | 0.132 | 0.717 | 0.953 | 0.734 | 1.235 |
| Index month: February vs. January | 0.136 | 0.127 | 1.157 | 0.282 | 1.146 | 0.894 | 1.470 |
| Days from AF to index | 0.001 | 0.001 | 0.362 | 0.548 | 1.001 | 0.998 | 1.003 |
| Prescribing physician specialty: Other vs. family practice | -0.004 | 0.099 | 0.002 | 0.968 | 0.996 | 0.820 | 1.211 |
| Prescribing physician specialty: Cardiology vs. family practice | -0.141 | 0.105 | 1.815 | 0.178 | 0.868 | 0.707 | 1.066 |
| Prescribing physician specialty: Internal medicine vs. family practice | -0.078 | 0.084 | 0.863 | 0.353 | 0.925 | 0.787 | 1.092 |
| Number of unique medication classes | 0.015 | 0.007 | 4.628 | 0.032 | 1.015 | 1.001 | 1.029 |
| Number of prescriptions for cardiovascular medications | -0.020 | 0.005 | 16.094 | <0.0001 | 0.980 | 0.971 | 0.990 |
